# Supplementary material for: Renal Cystic Disease Proteins Play Critical Roles in the Organization of the Olfactory Epithelium
Source: PubMed Central journal article supplement (PMC3094399; doi:10.1371/journal.pone.0019694), 2011-05-13
Supplement: pone.0019694.s010.pdf [file pone.0019694.s010.pdf]

## Supporting Information

### *Olfactory epithelium of $PC1^{-/-}$ mice*

Because mutations in *PC1* are the most common cause of renal cystic disease, we also sought to determine if PC1 played a role in the OE. In order to examine this, we used a mouse model in which PC1 was specifically deleted in the mature OSNs using olfactory marker protein driving the expression of CRE (OMP-CRE).

In mice in which PC1 was deleted in the OE (*OMP-CRE, PKD1<sup>fllox/-</sup>*), we were unable to find differences in expression or localization of AC3, G<sub>olf</sub> or MKS3 (Figure S3A). In addition, immunofluorescence for two well-characterized ORs (mOR28, M50) revealed apparently normal OR localization to the cilia, knob, apical dendrite and cell body; in addition, cilia structure appeared normal at the light microscopy level (Figure S3B).

## **Methods**

### *Co-immunoprecipitation*

COS cells were transfected with either empty vector (mock), or with vector encoding MKS3 (or, in other experiments, MKS1) +/- vector encoding MOR18-2, MOR256-21, MOR256-25, MOR256-24 or MOR-EG. The MKS3 construct (NM\_153604.5) contains the full-length, untagged sequence of MKS3 in a pcDNA3.1 vector, and was modified from a vector originally made by C. Johnson. The MKS1 construct in pcDNA3.1 was provided by S. Weatherbee and includes a C-terminal HA

tag. All OR constructs were tagged with Flag and Rho. The MOR-EG construct (in a pME18S vector containing Flag and Rho tags) was a kind gift from S. Firestein; the other Olfr constructs were made by PCR of the full-length transcript from kidney using primers which contained restriction sites, and subcloning into the pME18S vector after excising the MOR-EG sequence with restriction enzymes. MOR18-2, MOR256-25 and MOR256-24 were subcloned between EcoRI and XhoI, whereas MOR256-21 was subcloned between EcoRI and SpeI. By immunofluorescence, we did not observe any changes in the localization of either protein (MKS or OR proteins) due to their co-expression in transfected cells.

Transfected cells were incubated for 24 hrs, and then lysed in cold TEN-T (100mM NaCl, 50mM Tris pH=7.5, 1mM EDTA and 1% Triton X-100). Lysates were cleared by centrifugation, and 20 $\mu$ l were set aside as lysate controls. Lysates were then incubated overnight with 20 $\mu$ l washed mouse anti-Flag sepharose beads. Beads were recovered by centrifugation, and 20 $\mu$ l of unbound lysate was set aside as representative of the unbound fraction. Beads were then washed (three times in TEN-T, once in PBS), and 3X sample buffer containing DTT was added. Samples were not heated. Samples were loaded onto 10% PAGE gels, and proteins were transferred to nitrocellulose. Membranes were probed using an anti-meckelin polyclonal antibody (MKS3) or an anti-HA antibody (MKS1) (1). The expected size for MKS3 is 112 kDa, whereas the expected size for MKS1 is 65 kDa. MKS1 typically ran as doublet.

## References

1. Dawe HR et al (2007) The Meckel-Gruber Syndrome proteins MKS1 and meckelin interact and are required for primary cilium formation. *Hum Mol Genet* 2: 173-186.
